# Supplementary material for: Ultraviolet light-breakable and tunable thermoresponsive amphiphilic block copolymer: from self-assembly, disassembly to re-self-assembly
Source: Royal Society of Chemistry journal article supplement (doi:10.1039/c3py01681a), 2014-01-01
Supplement: c3py01681a1.pdf [file c3py01681a1.pdf]

Electronic Supplementary Information for:

Ultraviolet light-breakable and tunable thermoresponsive  
amphiphilic block copolymer: from self-assembly, disassembly to  
re-self-assembly

Weizhong Yuan<sup>\*ab</sup> and Wen Guo<sup>a</sup>

*<sup>a</sup>Institute of Nano and Bio-polymeric Materials, School of Materials Science and Engineering,  
Tongji University, 4800Cao'an Road, Shanghai 201804, People's Republic of China. E-mail:  
yuanwz@tongji.edu.cn; Fax: +86-21-6958-4723; Tel: +86- 21-6958-0234*

*<sup>b</sup>Key Laboratory of Advanced Civil Materials, Ministry of Education, 4800Cao'an Road,  
Shanghai 201804, People's Republic of China. E-mail: yuanwz@tongji.edu.cn; Fax: +86-21-  
6958-4723; Tel: +86- 21-6958-0234*

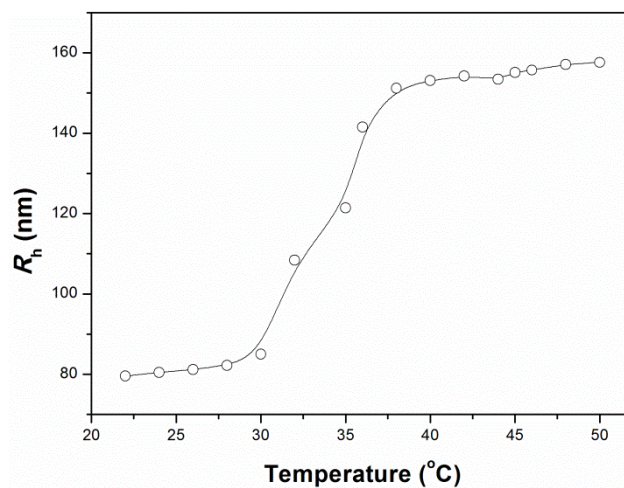

**Fig. S1** Temperature dependence of hydrodynamic radius ( $R_h$ ) for PNBM-*b*-P(MEO<sub>2</sub>MA-*co*-OEGMA) micelles ([MEO<sub>2</sub>MA]:[OEGMA]=92:8). (Concentration: 2 mg/mL)
